# Supplementary material for: Effectiveness of interventions for reducing TB incidence in countries with low TB incidence: a systematic review of reviews
Source: PubMed Central journal article supplement — Eur Respir Rev. 2019 May 29;28(152):180107. doi: 10.1183/16000617.0107-2018 (PMC9489042; doi:10.1183/16000617.0107-2018), 2019-05-29
Supplement: ERR-0107-2018.Appendix_S1_-_Search_terms.pdf [file ERR-0107-2018.Appendix_S1_-_Search_terms.pdf]

## Appendix 1: Search strings

### EMBASE

1. ("tubercul\$" or "mycobacter\$" or "TB").ti.
2. exp tuberculosis/
3. 1 or 2
4. MEDLINE.tw.
5. exp systematic review/ or systematic review.tw.
6. meta-analysis/
7. intervention\$.ti.
8. 4 or 5 or 6 or 7
9. 3 and 8

### MEDLINE

1. tubercul\$.ti.
2. mycobacter\$.ti.
3. TB.ti.
4. tuberculosis.xm.
5. 1 or 2 or 3 or 4
6. MEDLINE.tw.
7. systematic review.tw.
8. meta-analysis.pt.
9. intervention\$.ti.
10. 6 or 7 or 8 or 9
11. 5 and 10

### CINAHL

((tubercul\*).ti OR (mycobacter\*).ti OR (TB).ti OR exp "MYCOBACTERIUM INFECTIONS"/) AND ((MEDLINE).ti OR (MEDLINE).ab OR exp "LITERATURE REVIEW"/ OR (systematic review).ti OR (systematic review).ab OR exp "META ANALYSIS"/ OR (intervention\*).ti)

### Global Health

(TI tubercul\* OR TI mycobacter\* OR TI TB OR SU tuberculosis) AND (TI MEDLINE OR AB MEDLINE OR SU systematic review OR TI systematic review OR AB systematic review OR SU meta-analysis OR TI intervention\*)

### Scopus

(TITLE-ABS(tubercul\*) OR TITLE-ABS(mycobacter\*) OR TITLE-ABS(TB)) AND (TITLE-ABS(MEDLINE) OR TITLE-ABS(systematic review) OR TITLE(meta-analysis) OR TITLE(intervention\*))

### Trip

(tubercul\* or mycobacter\* or TB)
