# Supplementary material for: Effectiveness of interventions for reducing TB incidence in countries with low TB incidence: a systematic review of reviews
Source: PubMed Central journal article supplement — Eur Respir Rev. 2019 May 29;28(152):180107. doi: 10.1183/16000617.0107-2018 (PMC9489042; doi:10.1183/16000617.0107-2018), 2019-05-29
Supplement: ERR-0107-2018.Appendix_S2_-_Study_inclusion_checklist.pdf [file ERR-0107-2018.Appendix_S2_-_Study_inclusion_checklist.pdf]

Appendix S2 – Full text inclusion/exclusion checklist

|                               |                                                                                                                                                                                                              |                                 |                                 |                                |                                  |                                |                         |                          |
|-------------------------------|--------------------------------------------------------------------------------------------------------------------------------------------------------------------------------------------------------------|---------------------------------|---------------------------------|--------------------------------|----------------------------------|--------------------------------|-------------------------|--------------------------|
| First author (year):          |                                                                                                                                                                                                              |                                 |                                 |                                |                                  |                                |                         |                          |
| Inclusion/exclusion criteria: |                                                                                                                                                                                                              |                                 |                                 |                                |                                  | Yes                            | No                      | Unsure                   |
| 1.                            | Is this a systematic review?                                                                                                                                                                                 |                                 |                                 |                                |                                  |                                |                         |                          |
| 2.                            | Is this an economic evaluation?                                                                                                                                                                              |                                 |                                 |                                |                                  |                                |                         |                          |
| 3.                            | Is an intervention clearly defined?                                                                                                                                                                          |                                 |                                 |                                |                                  |                                |                         |                          |
| 4.                            | Is it relevant to TB control and prevention in countries of low TB incidence?                                                                                                                                |                                 |                                 |                                |                                  |                                |                         |                          |
| 5.                            | Does the study report a direct effect (preventing cases/reducing incidence) as a PRIMARY outcome?                                                                                                            |                                 |                                 |                                |                                  |                                |                         |                          |
| 6.                            | Does the study report a direct effect (preventing cases/reducing incidence) as a SECONDARY outcome?                                                                                                          |                                 |                                 |                                |                                  |                                |                         |                          |
| 7.                            | Does the intervention have a plausible INDIRECT effect (preventing cases/reducing incidence)?                                                                                                                |                                 |                                 |                                |                                  |                                |                         |                          |
| 8.                            | Does the review describe contextual factors ('risk factors') which could modify the effect of an intervention or which, if addressed in a hypothetical intervention, could lead to a reduction TB incidence? |                                 |                                 |                                |                                  |                                |                         |                          |
| Classification (circle):      |                                                                                                                                                                                                              | INCLUDE                         |                                 |                                |                                  | EXCLUDE                        |                         |                          |
|                               |                                                                                                                                                                                                              | 1° DIRECT<br>(1, 3, 4, 5 = Yes) | 2° DIRECT<br>(1, 3, 4, 6 = Yes) | INDIRECT<br>(1, 3, 4, 7 = Yes) | RISK FACTORS<br>(1, 4, 8 = Yes)  | Not systematic<br>(1 & 2 = No) | Not defined<br>(3 = No) | Not relevant<br>(4 = No) |
| Comment:                      |                                                                                                                                                                                                              |                                 |                                 |                                | Economic only<br>(2, 3, 4 = Yes) | No effect<br>(5, 6 or 7 = No)  | Any other reason        |                          |
